# Supplementary material for: Inhaled H2 or CO2 Do Not Augment the Neuroprotective Effect of Therapeutic Hypothermia in a Severe Neonatal Hypoxic-Ischemic Encephalopathy Piglet Model
Source: PubMed Central journal article supplement (PMC7555370; doi:10.3390/ijms21186801), 2020-09-16
Supplement: ijms-21-06801-s001.pdf [file ijms-21-06801-s001.pdf]

**Inhaled H<sub>2</sub> or CO<sub>2</sub> do not augment the neuroprotective effect of therapeutic hypothermia  
in a severe neonatal hypoxic-ischemic encephalopathy piglet model**

Viktória Kovács , Gábor Remzsó, Valéria Tóth-Szúki, Viktória Varga, János Németh and Ferenc Domoki

| <i>Pattern</i>           | <i>Amplitude based EEG pattern</i>                                                            | <i>Score</i> |
|--------------------------|-----------------------------------------------------------------------------------------------|--------------|
| <i>Continuous</i>        | <i>&gt; 25 <math>\mu</math>V dominating pattern</i>                                           | <i>1</i>     |
| <i>Discontinuous</i>     | <i>&gt; 25 <math>\mu</math>V with short durations (1 – 5 s) below</i>                         | <i>2</i>     |
| <i>Low voltage 1</i>     | <i>25 – 10 <math>\mu</math>V</i>                                                              | <i>3</i>     |
| <i>Low voltage 2</i>     | <i>10 – 15 <math>\mu</math>V</i>                                                              | <i>4</i>     |
| <i>Burst suppression</i> | <i>Low voltage (&lt; 5<math>\mu</math>V) with bursts (&gt; 25 <math>\mu</math>V, 1 – 5 s)</i> | <i>5</i>     |
| <i>Inactive 1</i>        | <i>&lt; 5<math>\mu</math>V</i>                                                                | <i>6</i>     |
| <i>Inactive 2</i>        | <i>practically isoelectric</i>                                                                | <i>7</i>     |
|                          |                                                                                               |              |
| <i>Seizures</i>          | <i>electro/clinical convulsion</i>                                                            | <i>+2</i>    |

**Table S1.** Amplitude-based scoring system was used for visually evaluation of brain electric activity during asphyxia and the evolution of HIE. High amplitude patterns (> 10  $\mu$ V) during the initial 10 minute of given time points received lower (1–3) scores, while severely depressed (< 10  $\mu$ V) brain electric activity was given higher (4–7) ones. The presence of seizure activity during the evaluated period was indicated by adding 2 extra points to the assessed background activity.

|       |                      | F3             | F4             | Cz             | C3             | C4             | T3             | T4             | O1             | O2             |
|-------|----------------------|----------------|----------------|----------------|----------------|----------------|----------------|----------------|----------------|----------------|
| Delta | C-NT                 | 100.00 ± 14.07 | 100.00 ± 15.37 | 100.00 ± 13.39 | 100.00 ± 12.93 | 100.00 ± 15.21 | 100.00 ± 13.30 | 100.00 ± 16.06 | 100.00 ± 15.27 | 100.00 ± 17.01 |
|       | A-NT                 | 45.83 ± 4.56   | 63.51 ± 9.29   | 47.80 ± 6.05   | 63.67 ± 10.22  | 37.23 ± 6.48   | 43.66 ± 11.27  | 41.75 ± 7.08   | 55.41 ± 7.53   | 38.46 ± 5.79   |
|       | A-HT                 | 22.16 ± 5.44   | 32.02 ± 7.54   | 41.41 ± 8.71   | 19.52 ± 3.98   | 16.83 ± 3.48   | 9.04 ± 1.93    | 14.08 ± 5.69   | 19.32 ± 5.19   | 24.28 ± 6.22   |
|       | A-HT+H <sub>2</sub>  | 36.30 ± 19.42  | 49.06 ± 19.66  | 39.84 ± 11.24  | 38.01 ± 18.71  | 25.34 ± 27.70  | 24.86 ± 6.06   | 35.99 ± 28.41  | 35.09 ± 9.75   | 27.16 ± 15.05  |
|       | A-HT+CO <sub>2</sub> | 31.99 ± 6.97   | 38.22 ± 6.64   | 41.31 ± 7.57   | 27.48 ± 7.62   | 23.95 ± 5.20   | 13.42 ± 3.14   | 16.37 ± 3.31   | 17.15 ± 4.04   | 21.37 ± 5.28   |
| Theta | C-NT                 | 100.00 ± 18.40 | 100.00 ± 15.91 | 100.00 ± 21.33 | 100.00 ± 19.32 | 100.00 ± 17.90 | 100.00 ± 16.12 | 100.00 ± 24.09 | 100.00 ± 18.15 | 100.00 ± 29.48 |
|       | A-NT                 | 44.65 ± 6.18   | 46.12 ± 7.48   | 45.28 ± 9.52   | 46.17 ± 6.80   | 31.64 ± 3.81   | 39.93 ± 9.65   | 32.74 ± 6.35   | 51.98 ± 8.29   | 32.61 ± 4.07   |
|       | A-HT                 | 21.19 ± 5.96   | 23.60 ± 4.82   | 33.61 ± 9.08   | 18.56 ± 3.22   | 19.79 ± 4.32   | 11.92 ± 2.45   | 14.14 ± 3.16   | 18.48 ± 4.05   | 21.20 ± 4.28   |
|       | A-HT+H <sub>2</sub>  | 36.83 ± 8.18   | 50.16 ± 32.43  | 36.72 ± 8.11   | 28.64 ± 4.21   | 21.61 ± 6.24   | 23.45 ± 4.52   | 24.38 ± 5.60   | 27.90 ± 4.39   | 22.46 ± 20.61  |
|       | A-HT+CO <sub>2</sub> | 28.65 ± 7.33   | 26.54 ± 6.18   | 33.25 ± 8.59   | 15.81 ± 4.56   | 16.48 ± 4.14   | 10.17 ± 2.69   | 12.24 ± 3.23   | 13.81 ± 3.43   | 15.21 ± 3.96   |
| Alpha | C-NT                 | 100.00 ± 20.23 | 100.00 ± 20.64 | 100.00 ± 18.45 | 100.00 ± 19.87 | 100.00 ± 16.38 | 100.00 ± 17.46 | 100.00 ± 21.29 | 100.00 ± 15.65 | 100.00 ± 25.96 |
|       | A-NT                 | 35.66 ± 4.61   | 40.70 ± 6.25   | 38.52 ± 6.96   | 45.43 ± 9.23   | 29.09 ± 3.74   | 35.02 ± 6.33   | 32.91 ± 5.43   | 56.56 ± 11.85  | 32.74 ± 4.60   |
|       | A-HT                 | 21.68 ± 5.48   | 24.48 ± 5.53   | 26.07 ± 5.72   | 17.43 ± 3.16   | 19.03 ± 3.42   | 15.12 ± 2.60   | 17.73 ± 3.82   | 15.54 ± 3.26   | 21.02 ± 4.08   |
|       | A-HT+H <sub>2</sub>  | 34.63 ± 7.07   | 40.18 ± 12.03  | 28.37 ± 4.94   | 27.57 ± 3.98   | 21.13 ± 3.45   | 25.47 ± 4.81   | 26.80 ± 5.47   | 33.18 ± 5.76   | 19.53 ± 3.29   |
|       | A-HT+CO <sub>2</sub> | 22.03 ± 7.33   | 22.58 ± 9.36   | 18.50 ± 3.68   | 11.48 ± 2.79   | 11.87 ± 3.03   | 10.80 ± 2.71   | 11.26 ± 2.95   | 11.53 ± 2.67   | 12.47 ± 2.74   |
| Beta  | C-NT                 | 100.00 ± 16.79 | 100.00 ± 15.97 | 100.00 ± 15.17 | 100.00 ± 16.51 | 100.00 ± 15.55 | 100.00 ± 12.07 | 100.00 ± 16.15 | 100.00 ± 12.26 | 100.00 ± 19.39 |
|       | A-NT                 | 41.34 ± 4.89   | 44.95 ± 5.44   | 32.47 ± 4.96   | 49.97 ± 7.57   | 33.20 ± 4.06   | 36.67 ± 5.14   | 39.40 ± 4.68   | 58.22 ± 8.31   | 37.01 ± 4.24   |
|       | A-HT                 | 37.82 ± 13.00  | 44.42 ± 14.94  | 34.08 ± 9.07   | 25.06 ± 6.52   | 26.13 ± 6.76   | 25.66 ± 7.52   | 32.94 ± 9.76   | 26.20 ± 7.62   | 34.45 ± 7.12   |
|       | A-HT+H <sub>2</sub>  | 36.03 ± 6.37   | 38.47 ± 7.40   | 24.97 ± 4.92   | 33.22 ± 5.82   | 24.55 ± 3.98   | 31.86 ± 4.89   | 34.84 ± 5.29   | 45.31 ± 7.61   | 28.09 ± 4.75   |
|       | A-HT+CO <sub>2</sub> | 32.90 ± 14.75  | 34.41 ± 15.14  | 24.29 ± 10.64  | 19.39 ± 7.81   | 19.05 ± 8.19   | 19.93 ± 8.85   | 24.27 ± 11.83  | 26.73 ± 7.19   | 26.45 ± 8.39   |

**Table S2.** Average power spectral density (PSD) values in the 5 different groups, containing the frequency and channel information as well. Mean differences were significant (mean±SD, p<0.05) the values that were not different from each other are indicated with blue colors. Control-normothermia C-NT, asphyxia-normothermia A-NT, asphyxia-hypothermia A-HT, A-HT+H<sub>2</sub>, and A-HT+CO<sub>2</sub>.

**A**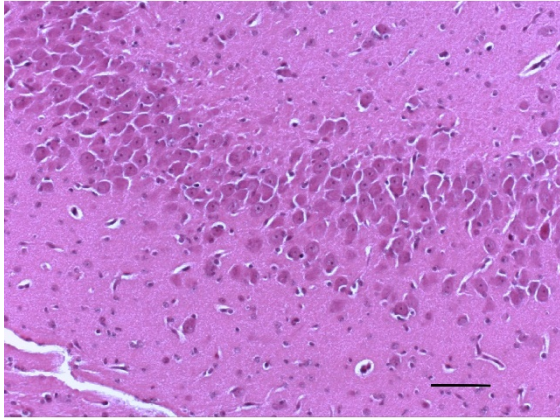**B**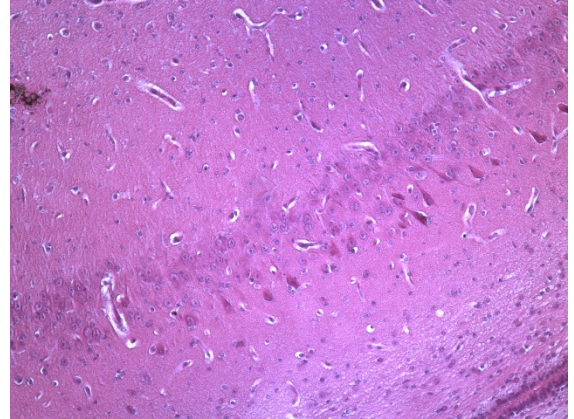**C**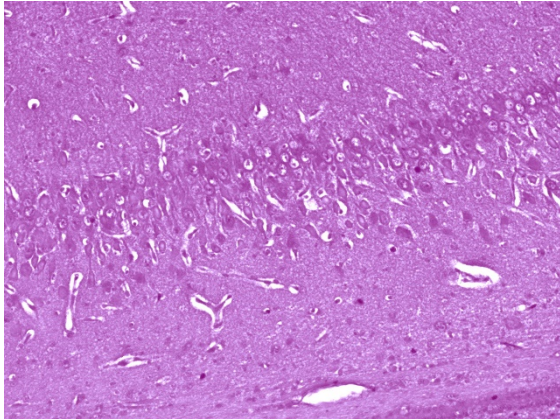**D**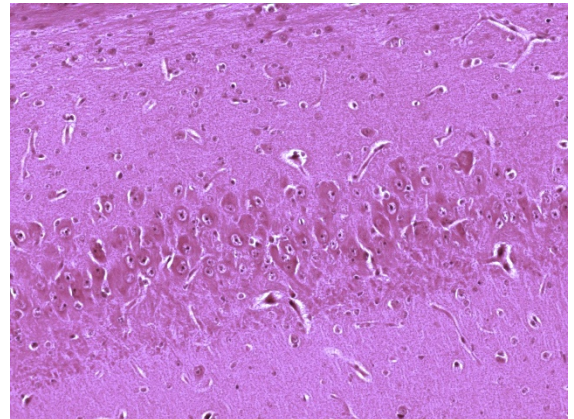**E**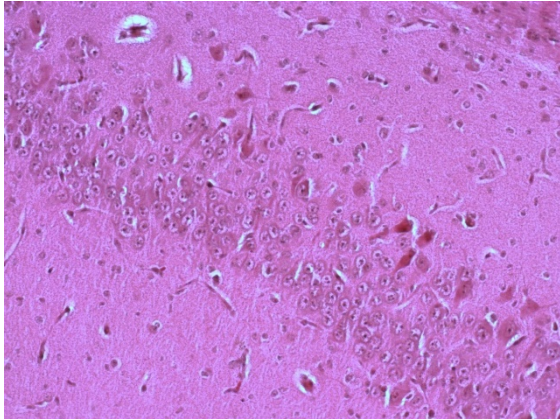**F**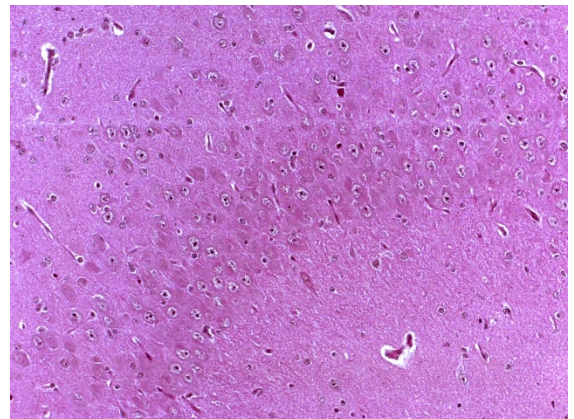

**Figure S1.** Observed neuronal injury at 48h after asphyxia. Representative H&E stained photomicrographs (20x) show the damaged neurons in the hippocampal CA1 region in the (A), Naïve (B) Control-normothermia C-NT, (C) asphyxia-normothermia A-NT, (D) asphyxia-hypothermia A-HT, (E) A-HT+H<sub>2</sub> and (F) A-HT+CO<sub>2</sub> groups (scale bar: 100µm).



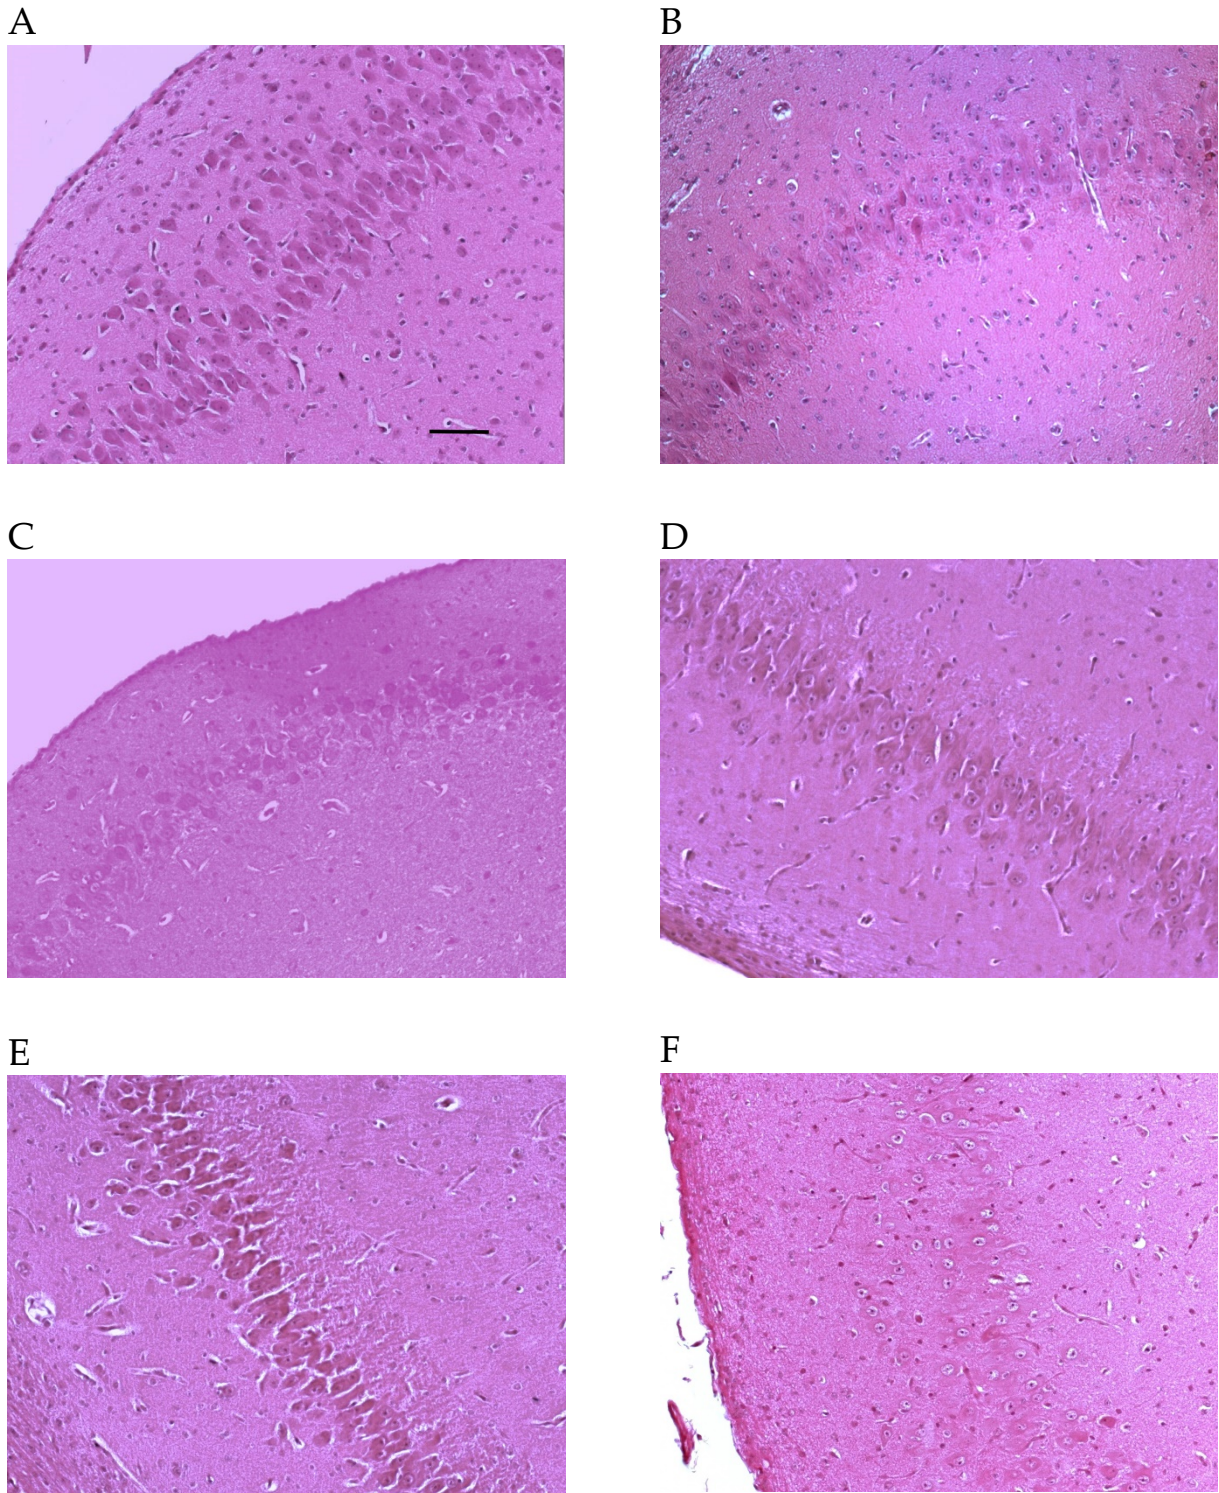

**Figure S2.** Observed neuronal injury at 48h after asphyxia. Representative H&E stained photomicrographs (20x) show the damaged neurons in the hippocampal CA3 region in the (A), Naïve (B) Control-normothermia C-NT, (C) asphyxia-normothermia A-NT, (D) asphyxia-hypothermia A-HT, (E) A-HT+H<sub>2</sub> and (F) A-HT+CO<sub>2</sub> groups (scale bar: 100µm).



**A**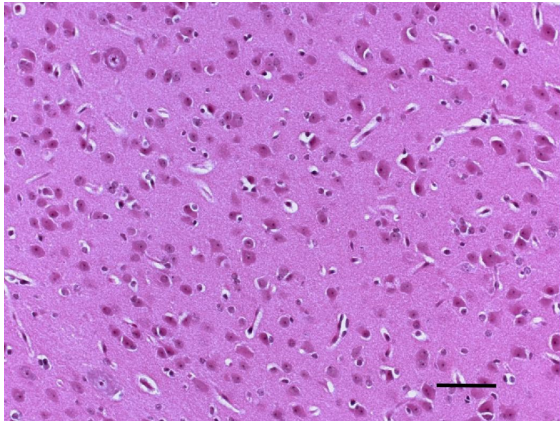**B**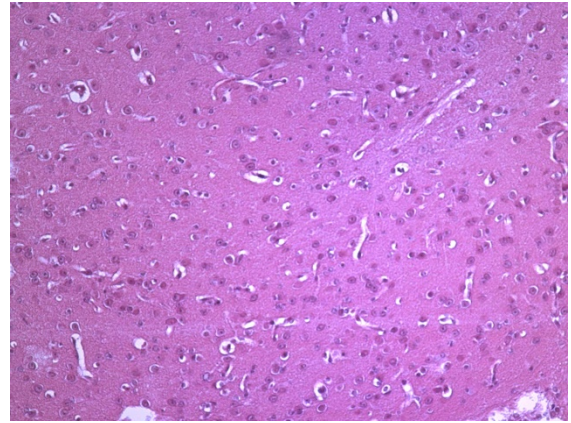**C**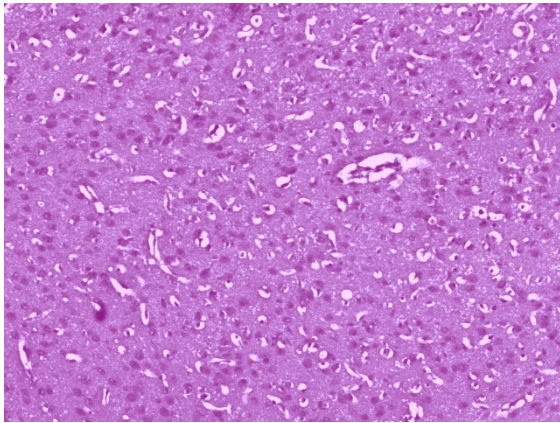**D**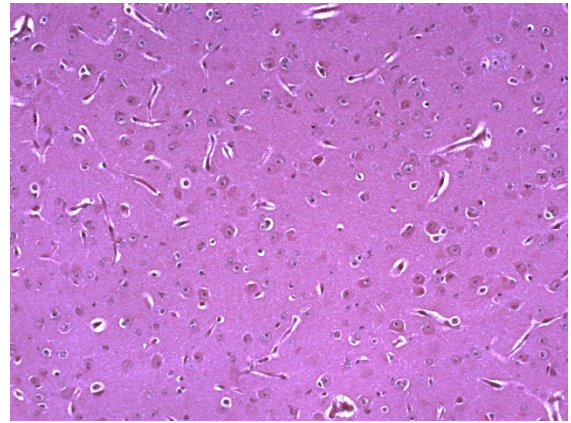**E**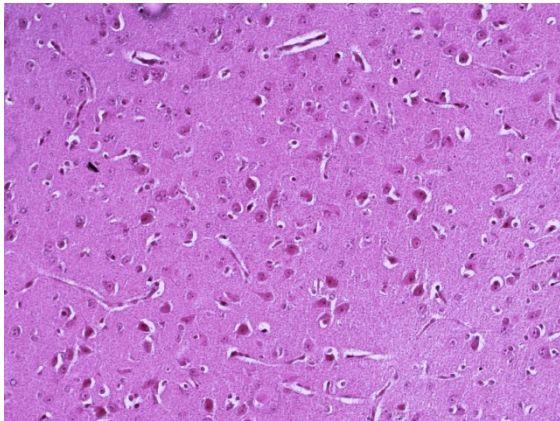**F**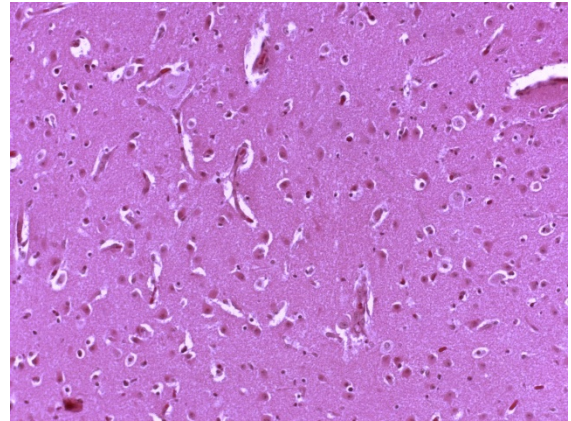

**Figure S3.** Observed neuronal injury at 48 hours after asphyxia. Representative H&E stained photomicrographs (20x) show the damaged neurons in the caudate nucleus in the (A), Naïve (B) Control-normothermia C-NT, (C) asphyxia-normothermia A-NT, (D) asphyxia-hypothermia A-HT, (E) A-HT+H<sub>2</sub> and (F) A-HT+CO<sub>2</sub> groups (scale bar: 100μm).



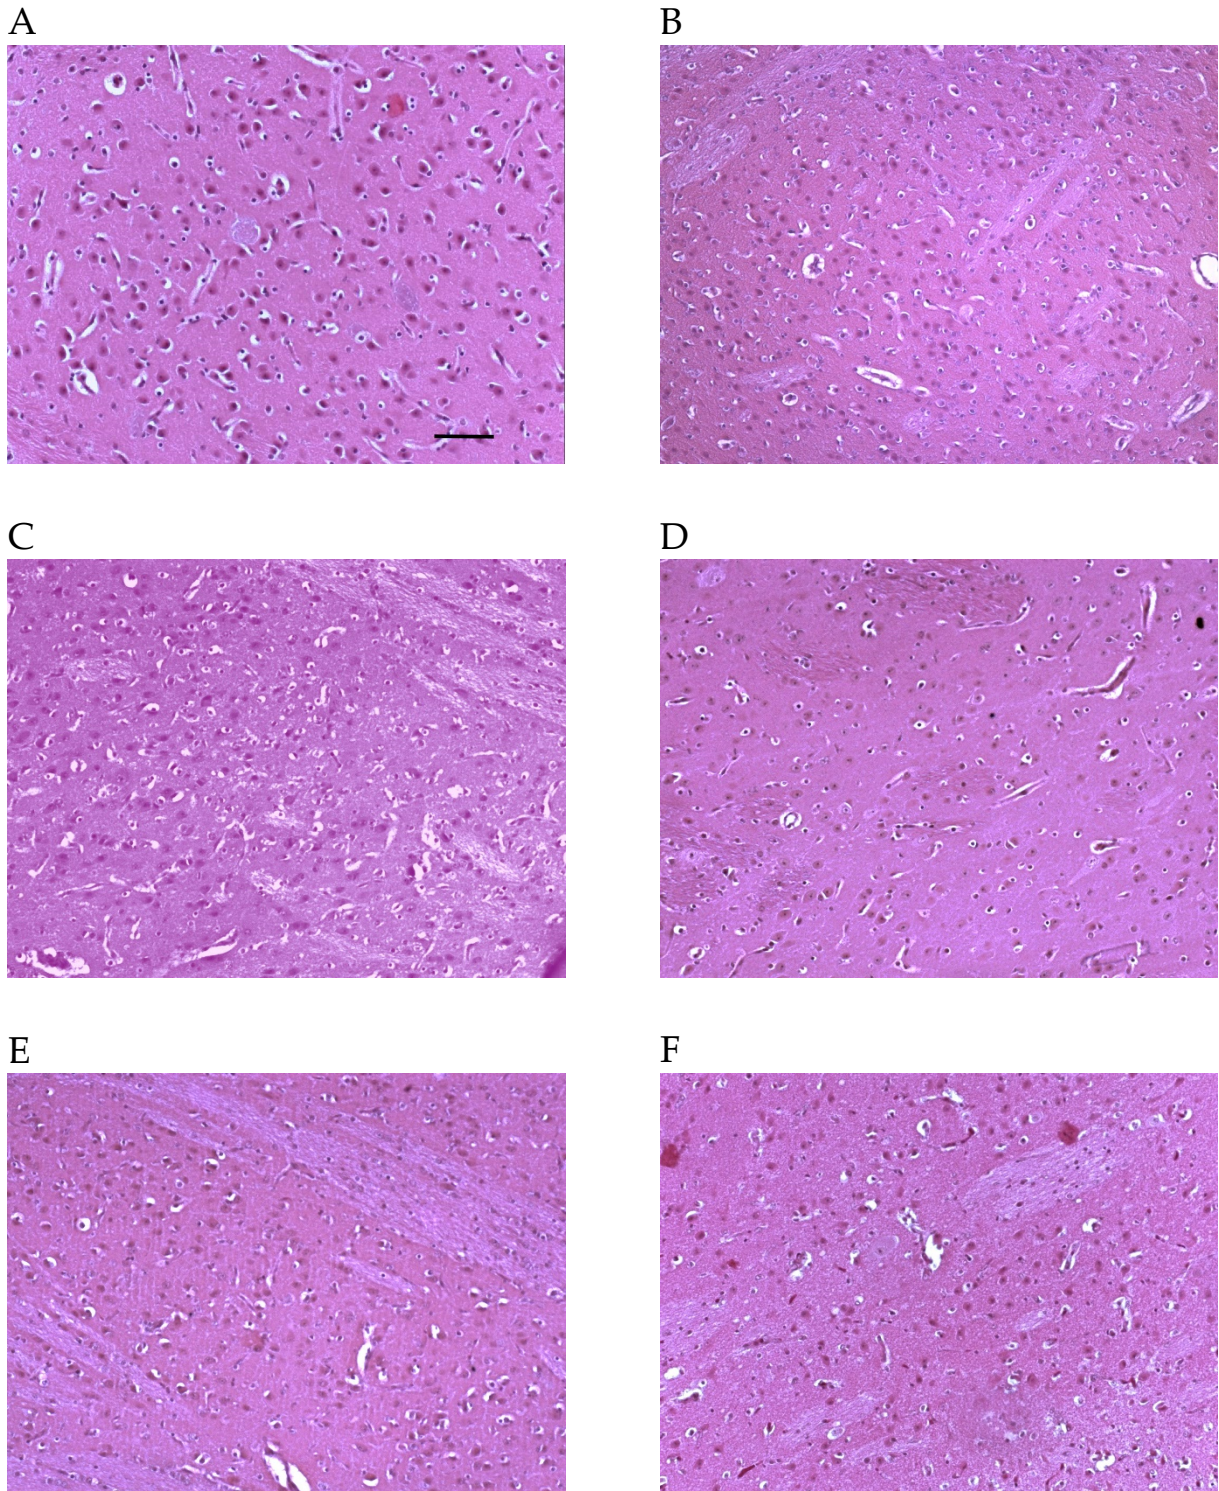

**Figure S4.** Observed neuronal injury at 48 hours after asphyxia. Representative H&E stained photomicrographs (20x) show the damaged neurons in the putamen in the (A), Naïve (B) Control-normothermia C-NT, (C) asphyxia-normothermia A-NT, (D) asphyxia-hypothermia A-HT, (E) A-HT+H<sub>2</sub> and (F) A-HT+CO<sub>2</sub> groups (scale bar: 100µm).



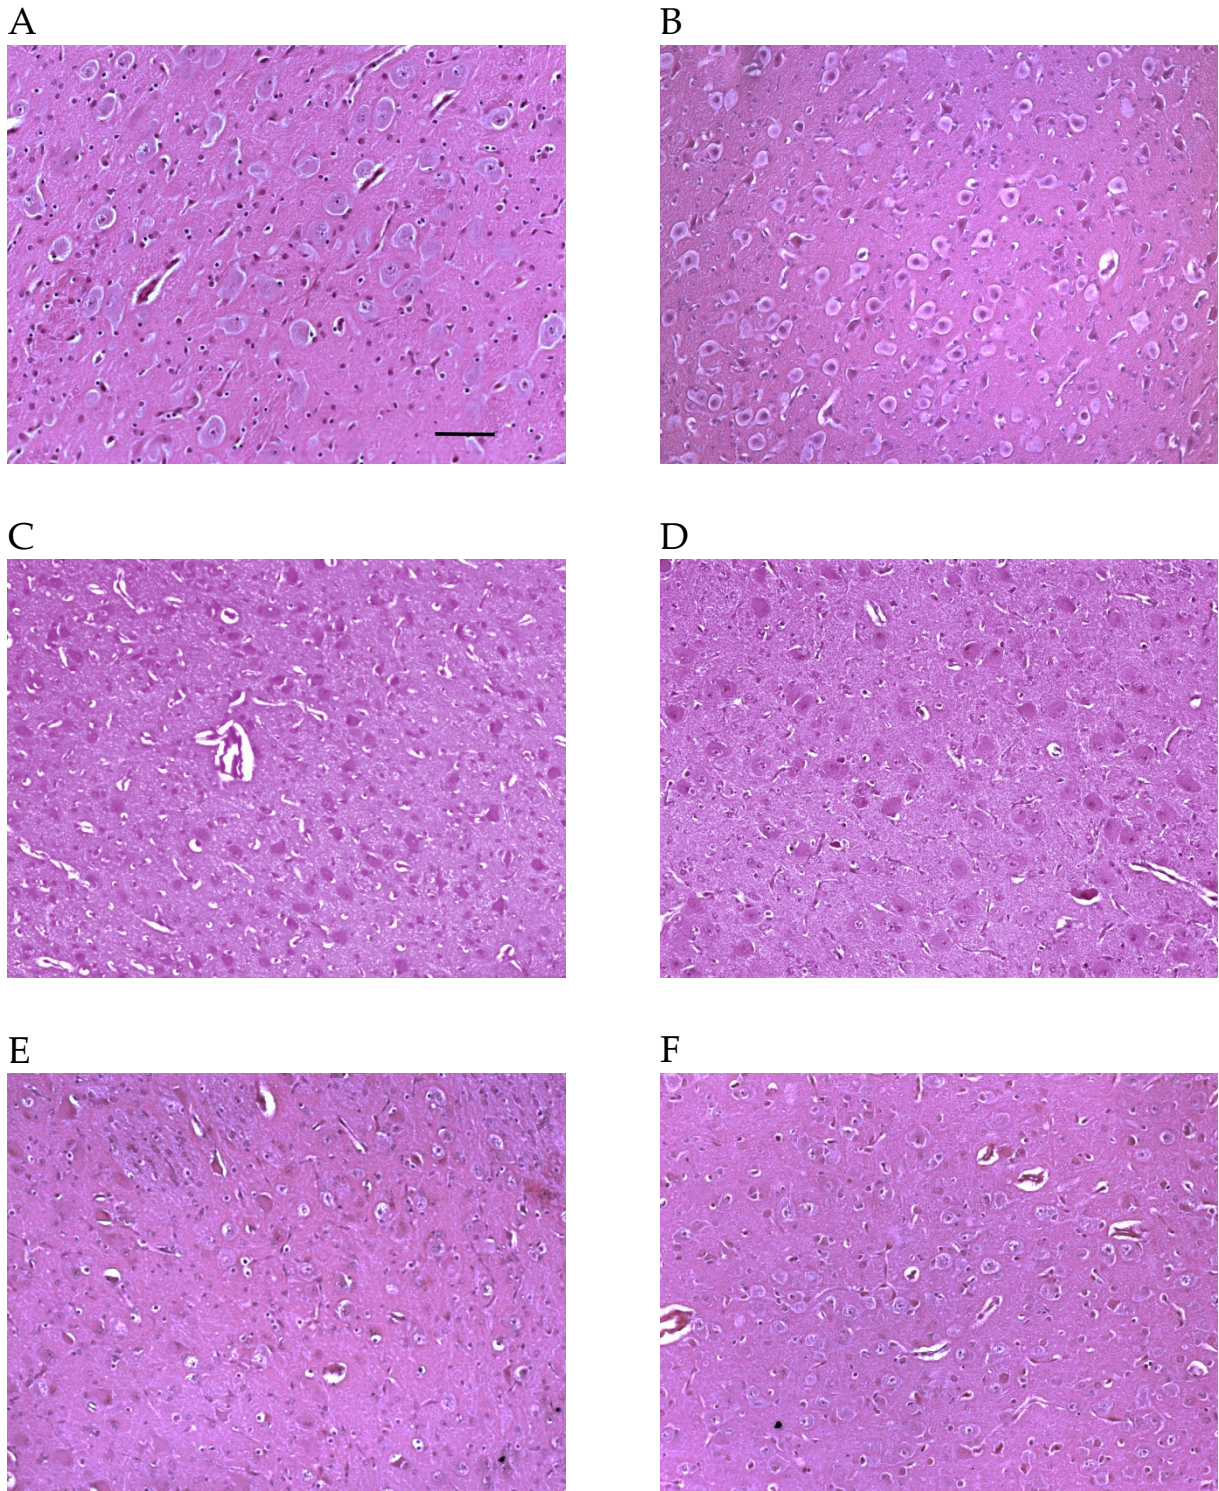

**Figure S5.** Observed neuronal injury at 48h after asphyxia. Representative H&E stained photomicrographs (20x) show the damaged neurons in the thalamus in the (A), Naïve (B) Control-normothermia C-NT, (C) asphyxia-normothermia A-NT, (D) asphyxia-hypothermia A-HT, (E) A-HT+H<sub>2</sub> and (F) A-HT+CO<sub>2</sub> groups (scale bar: 100μm).



A

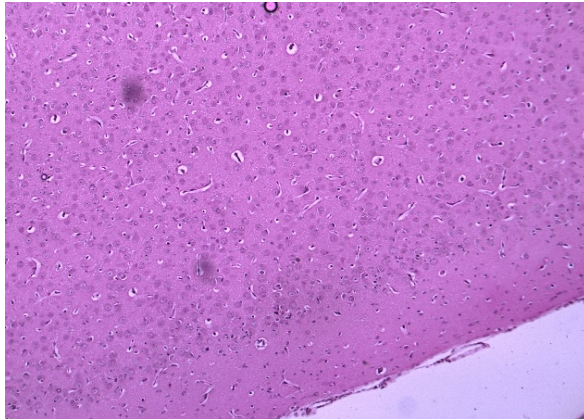

C

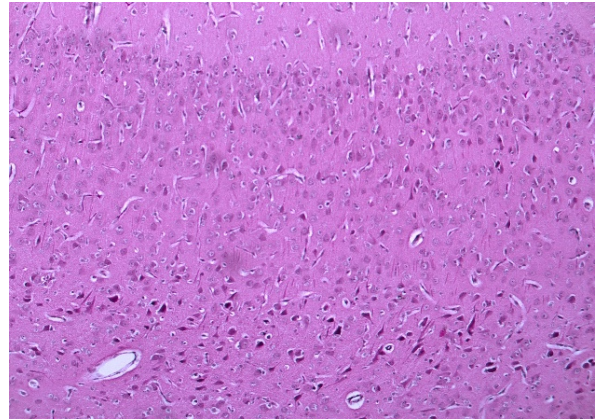

B

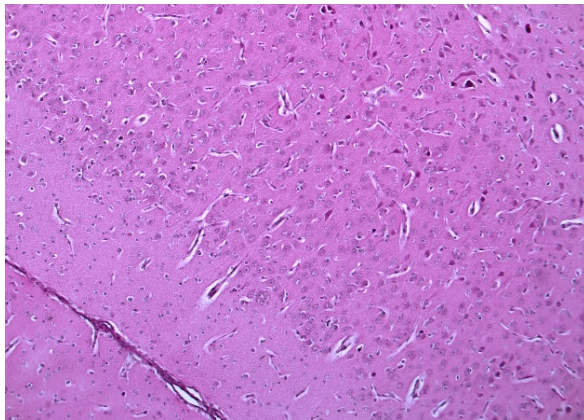

D

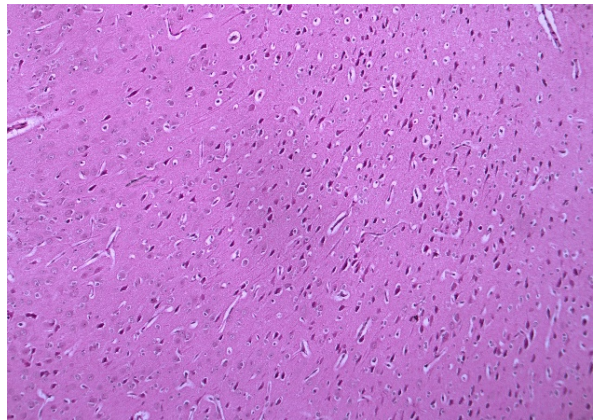

**Figure S6.** Representative H&E photomicrographs (10x). Cortical neuronal injuries were determined by using a neuropathology scoring system. The observed patterns were the following: (A) Intact cortex, (B) scattered -, (C) laminar -, (D) confluent neuronal damages.
